# Supplementary material for: Formation, control and functionalization of nanoporous zinc by selective corrosion of Al–Zn alloys with varying compositions
Source: Royal Society of Chemistry journal article supplement (doi:10.1039/d3ce01139a), 2024-01-01
Supplement: d3ce01139a1.pdf [file d3ce01139a1.pdf]

## Supplementary Information (SI)

### **Formation, control and functionalization of nanoporous zinc by selective corrosion of Al-Zn alloys with varying compositions**

Xueying Zhang,<sup>1</sup> Bin Yu,<sup>1</sup> Chi Zhang,<sup>2,\*</sup> Zhonghua Zhang<sup>1,\*</sup>

<sup>1</sup>Key Laboratory for Liquid-Solid Structural Evolution and Processing of Materials (Ministry of Education), School of Materials Science and Engineering, Shandong University, Jingshi Road 17923, Jinan 250061, P.R. China

<sup>2</sup>School of Applied Physics and Materials, Wuyi University, Jiangmen 529020, P.R. China

\*Corresponding author. Email: zh\_zhang@sdu.edu.cn (Z.H. Zhang);  
ch.zhang@outlook.com (C. Zhang)

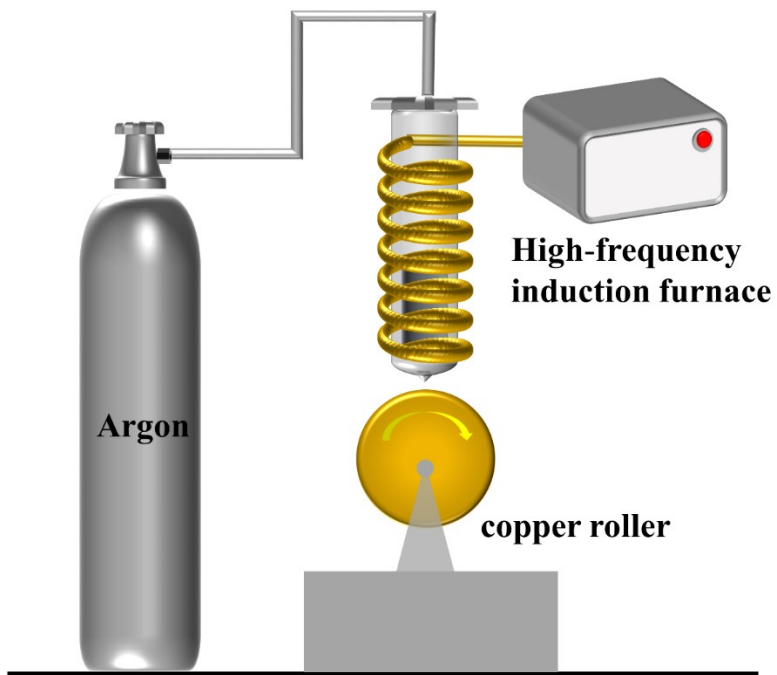

**Figure S1.** Schematic diagram of the melt spinning apparatus.

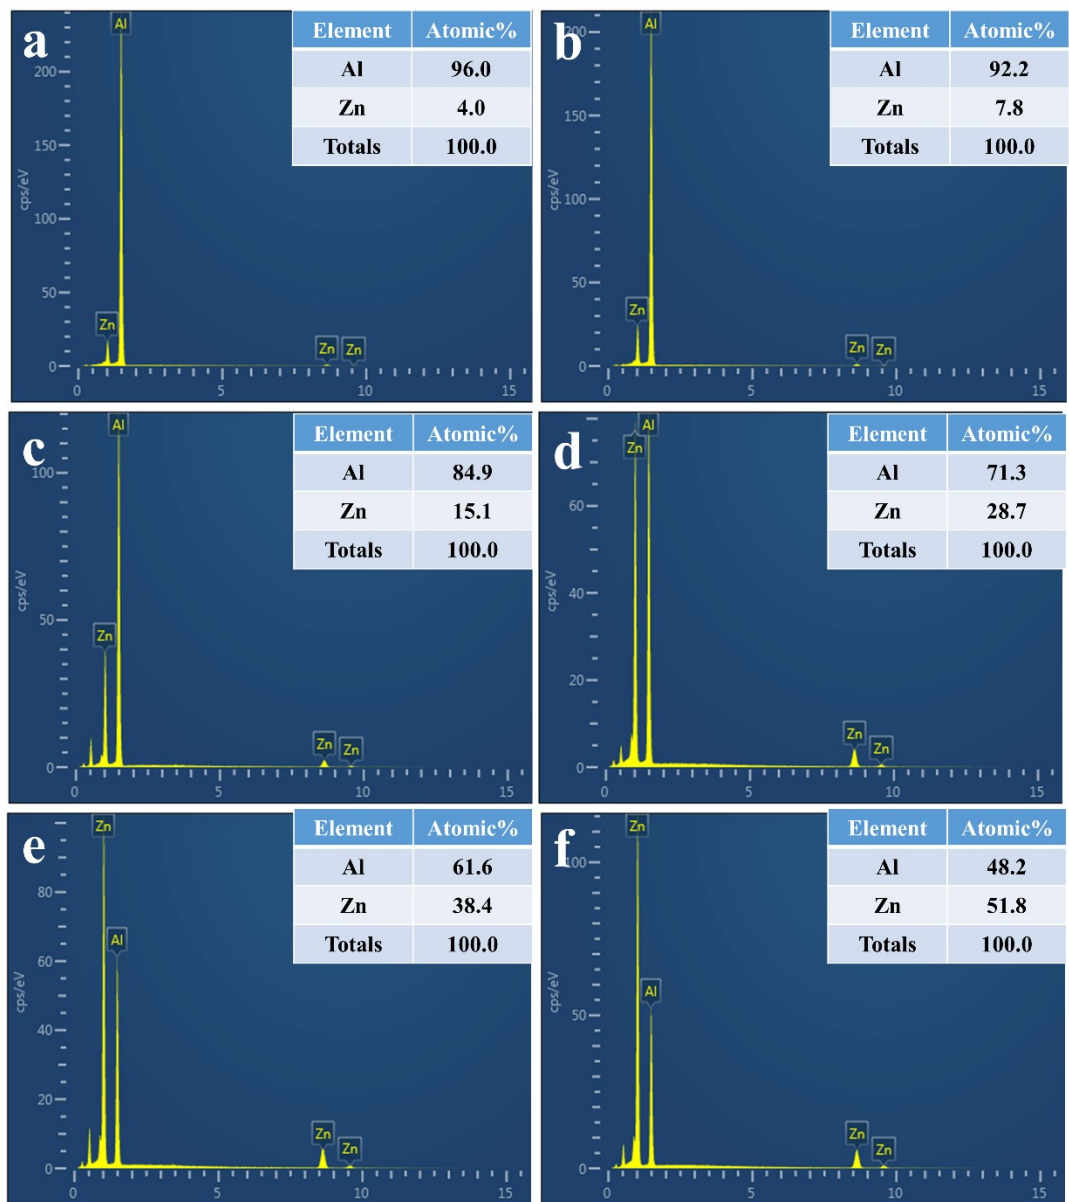

**Figure S2.** EDX spectrums and compositions (insets) of the RS Al-Zn alloys: (a)

$\text{Al}_{96}\text{Zn}_4$ , (b)  $\text{Al}_{92}\text{Zn}_8$ , (c)  $\text{Al}_{85}\text{Zn}_{15}$ , (d)  $\text{Al}_{70}\text{Zn}_{30}$ , (e)  $\text{Al}_{60}\text{Zn}_{40}$  and (f)  $\text{Al}_{50}\text{Zn}_{50}$ .

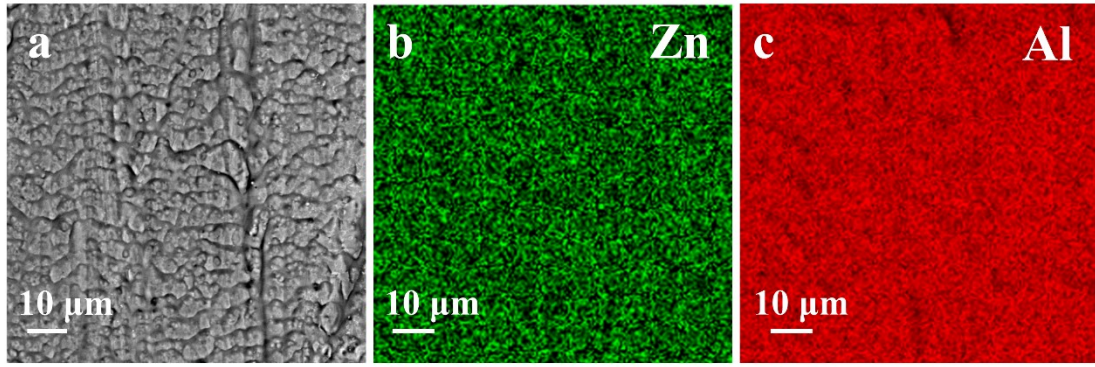

**Figure S3.** (a) BS-SEM image, (b,c) the mapping results of (b) Zn and (c) Al elements of the  $\text{Al}_9\text{Zn}_4$  alloy based on EDX.

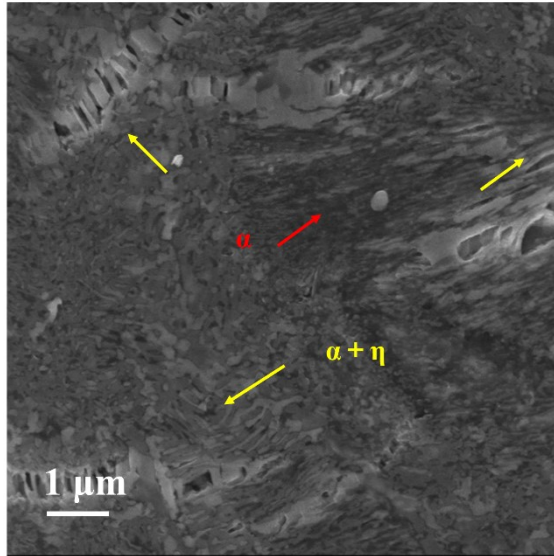

**Figure S4.** The SEM image of matrix and grain boundary microstructure of the Al<sub>60</sub>Zn<sub>40</sub> alloy.

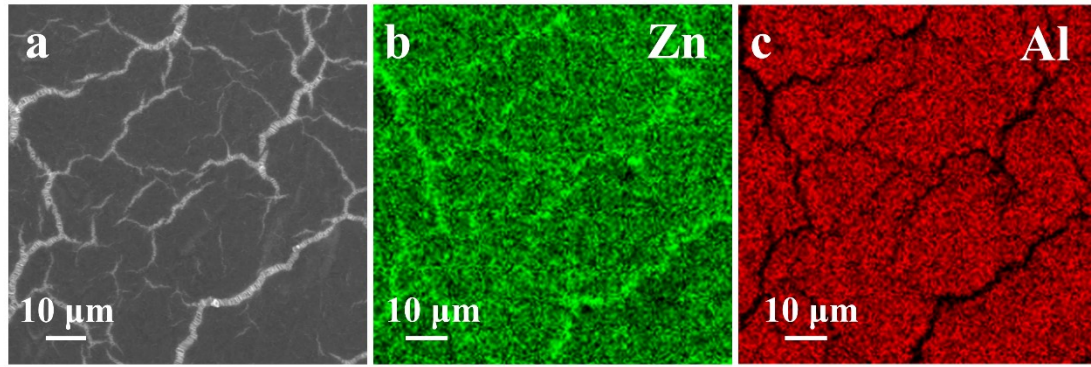

**Figure S5.** (a) SEM image, and (b,c) the mapping results of (b) Zn and (c) Al elements of the  $\text{Al}_{50}\text{Zn}_{50}$  alloy based on EDX.

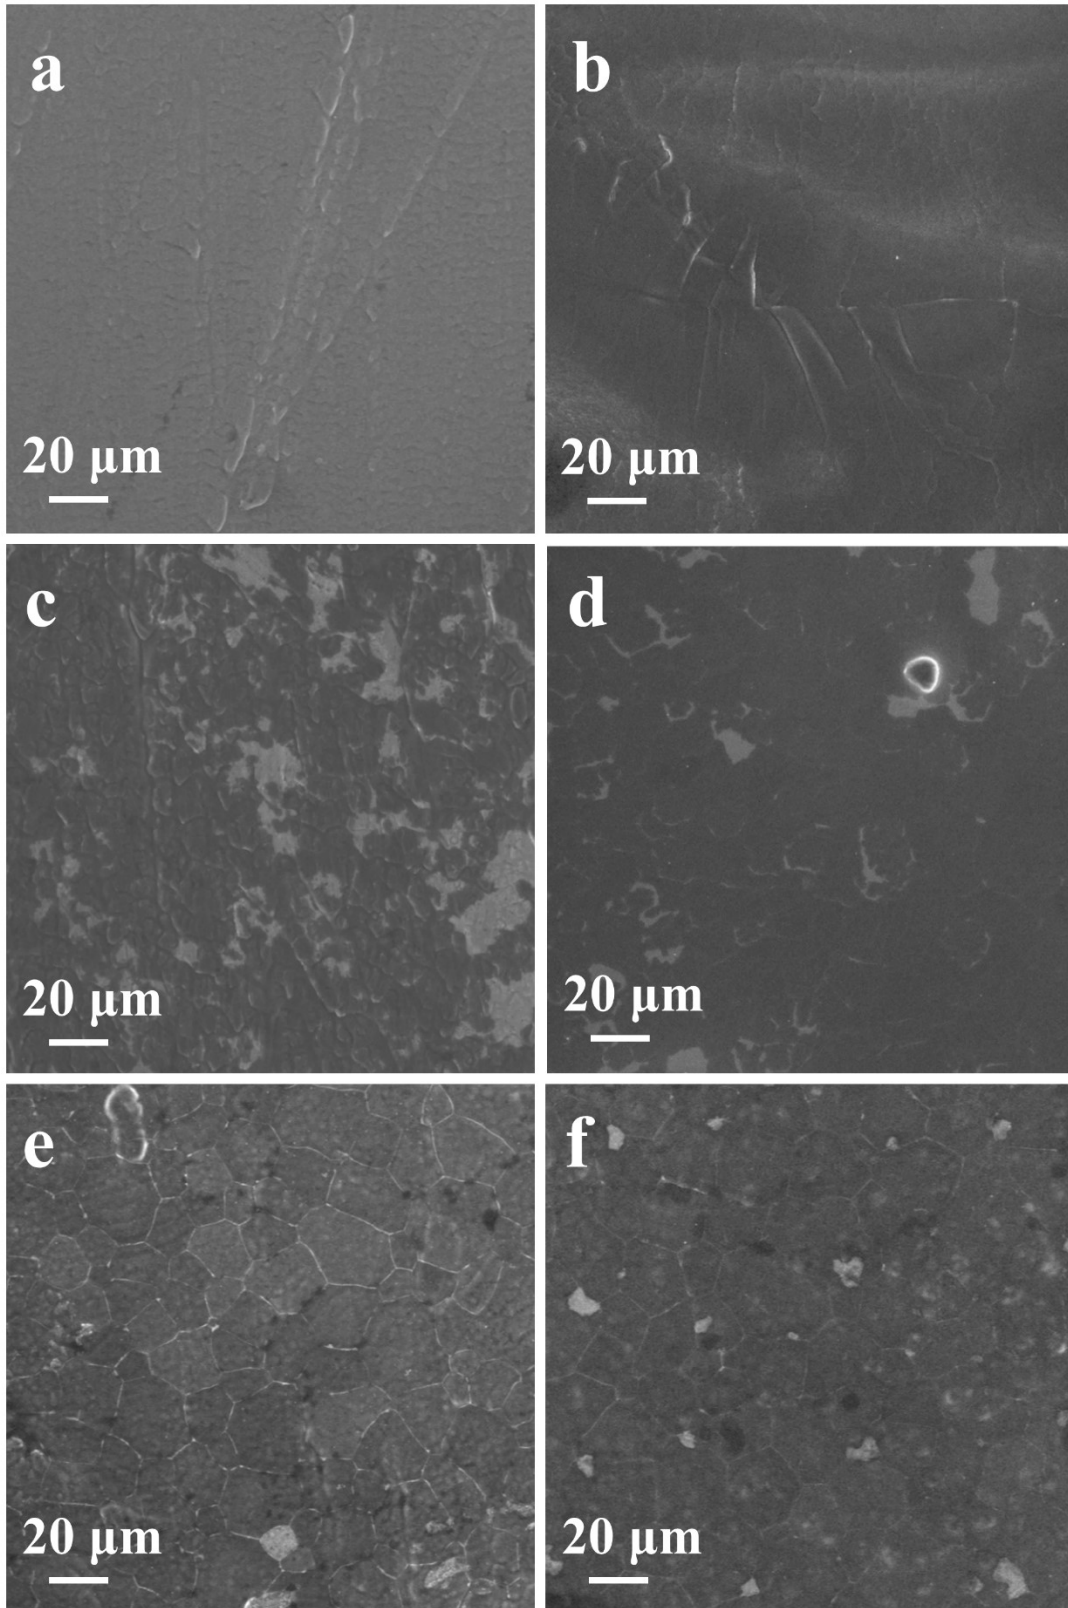

**Figure S6.** SEM images of (a,c,e) quenched and (b,d,f) free surfaces of the RS Al-Zn alloys: (a,b) Al<sub>96</sub>Zn<sub>4</sub>, (c,d) Al<sub>92</sub>Zn<sub>8</sub> and (e,f) Al<sub>85</sub>Zn<sub>15</sub>.

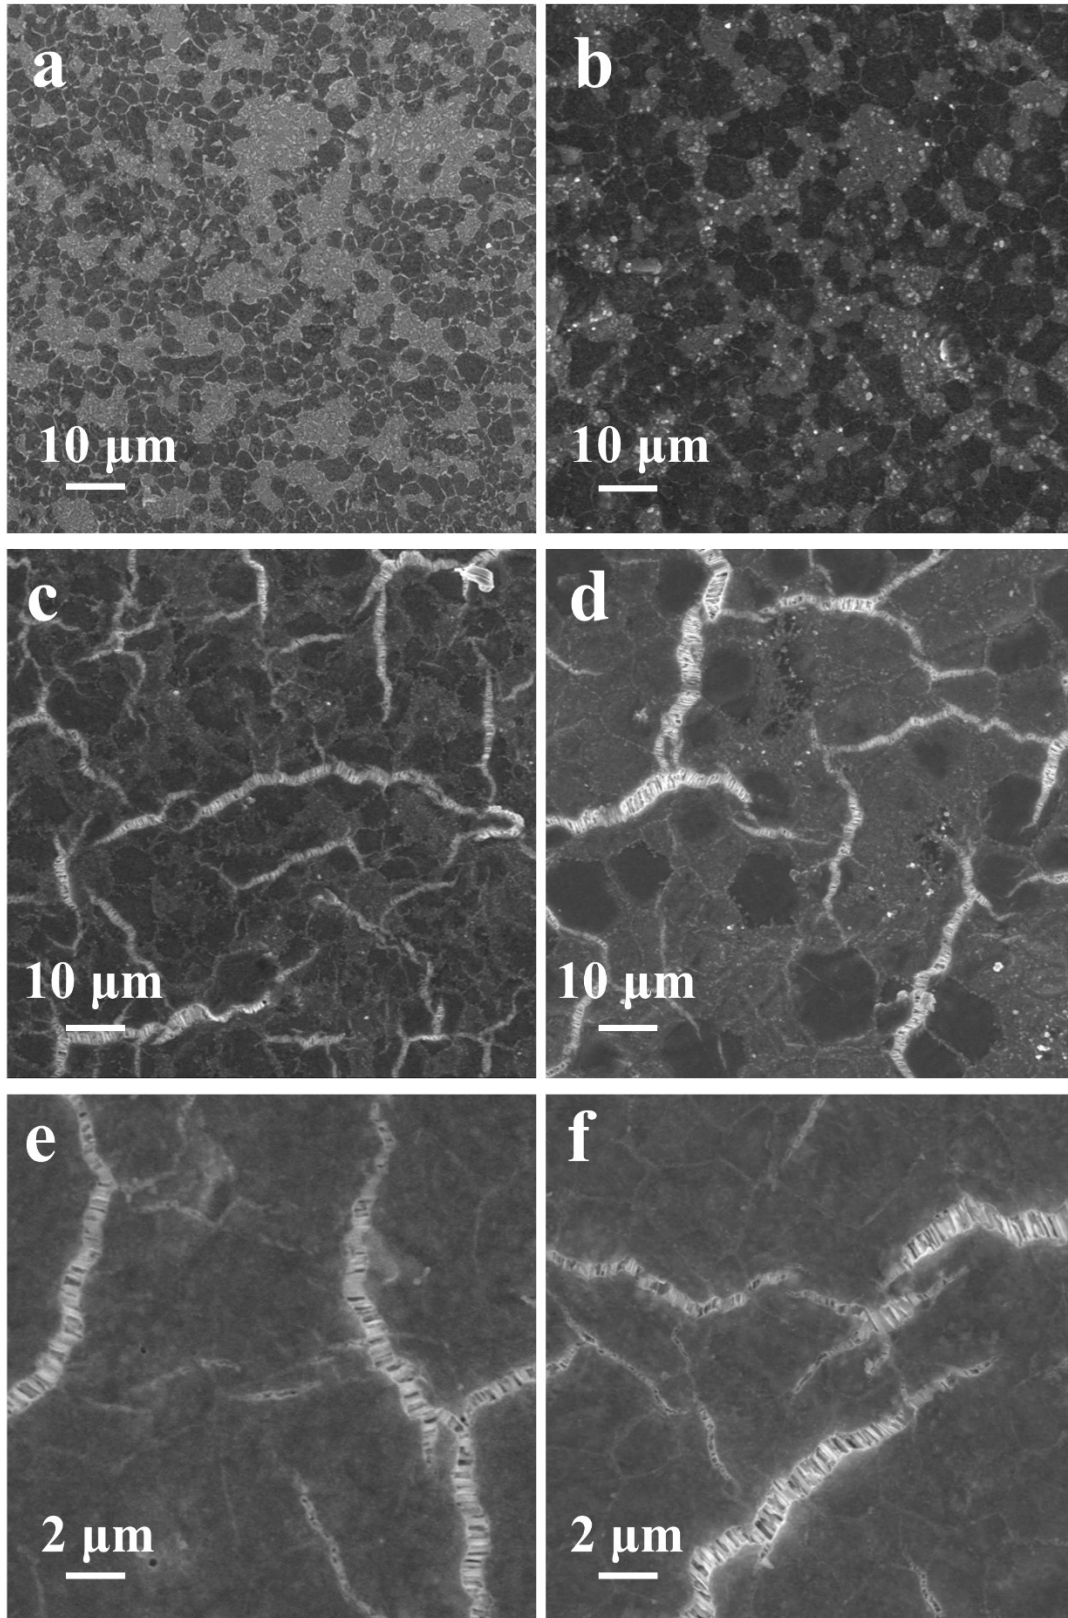

**Figure S7.** SEM images of (a,c,e) quenched and (b,d,f) free surfaces of the RS Al-Zn alloys: (a,b) Al<sub>70</sub>Zn<sub>30</sub>, (c,d) Al<sub>60</sub>Zn<sub>40</sub> and (e,f) Al<sub>50</sub>Zn<sub>50</sub>.



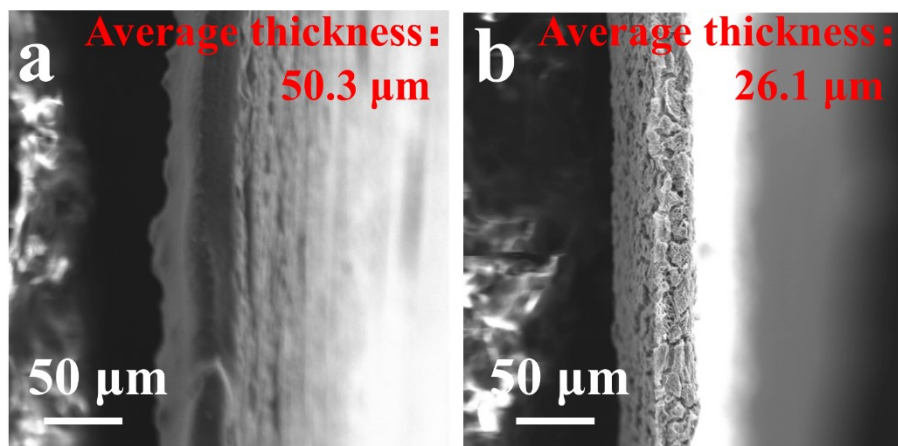

**Figure S8.** Cross-section view SEM images of (a) Al<sub>96</sub>Zn<sub>4</sub> alloy ribbon and (b) NP-Zn<sub>4</sub> ribbon.

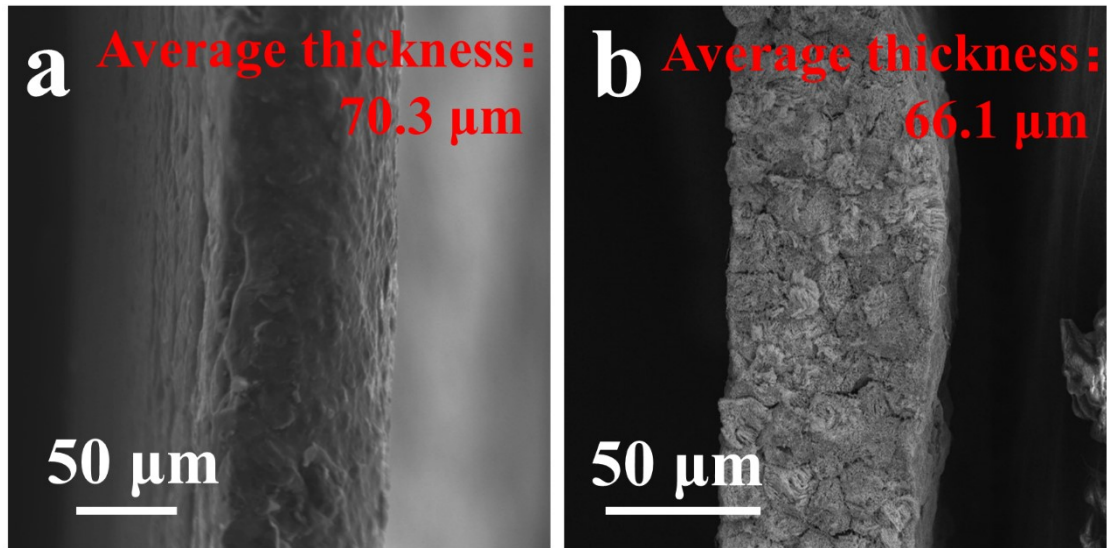

**Figure S9.** Cross-section view SEM images of (a)  $\text{Al}_{85}\text{Zn}_{15}$  alloy ribbon and (b) NP- $\text{Zn}_{15}$  ribbon.

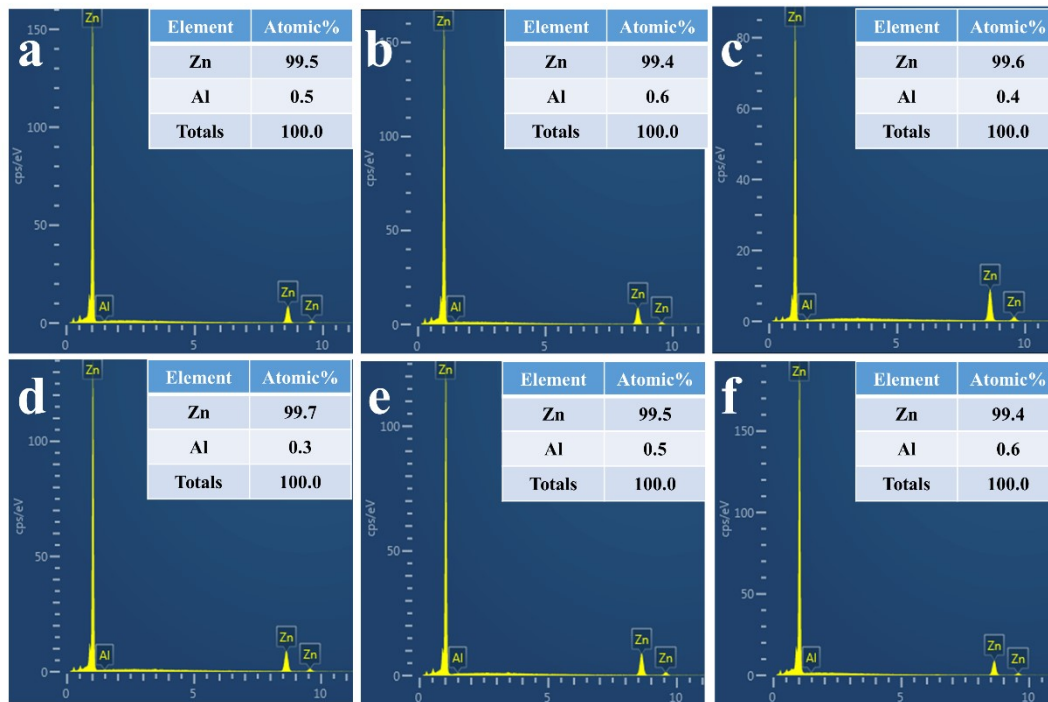

**Figure S10.** EDX spectra and compositions (insets) of the NP-Zn ribbons: (a) NP-Zn<sub>4</sub>, (b) NP-Zn<sub>8</sub>, (c) NP-Zn<sub>15</sub>, (d) NP-Zn<sub>30</sub>, (e) NP-Zn<sub>40</sub> and (f) NP-Zn<sub>50</sub>.

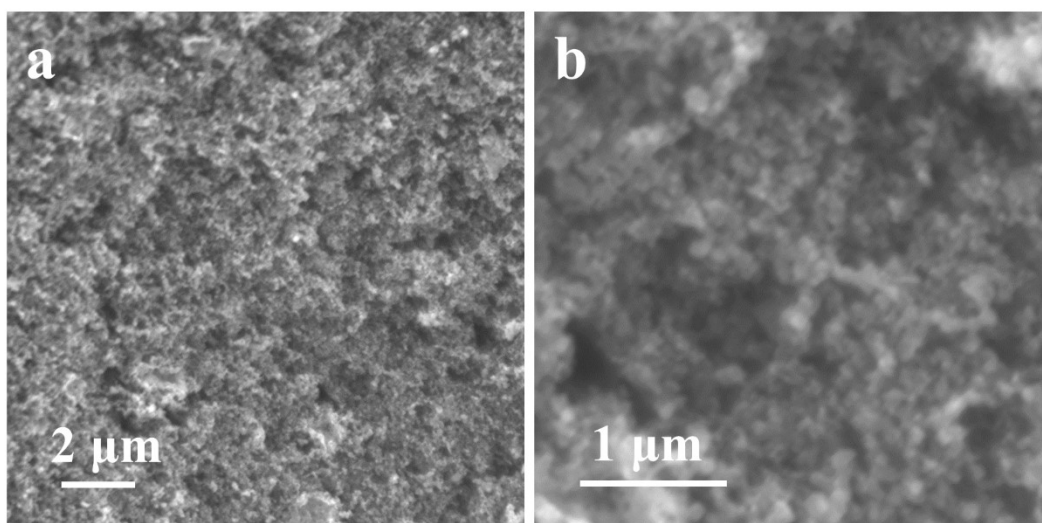

**Figure S11.** SEM images of the NP-Zn<sub>15</sub> electrode (a) before and (b) after 10 h electrolysis at -0.7 V vs. RHE.
